# Supplementary material
Source: PubMed Central journal article supplement (PMC535083)
Supplement: 7600418s1.pdf [file 7600418s1.pdf]

**Supplementary Figure 1. BMPRII short is not expressed in mouse cortical cell cultures.**

A schematic representation of the mouse BMPRII gene (top) including exon 11, 12 and 13 and the predicted mRNA product for full-length and short BMPRII is shown. The location of the stop codon for each mRNA is marked.

RNA from mouse cortical cell cultures was extracted using Triazol and was analyzed by RT-PCR using three sets of primers designed to amplify products of 300-400 base pairs. The approximate location of the primers, the expected size of the PCR-amplified product and the ethidium bromide stained agarose gel is shown. Arrowheads mark the expected migration of the PCR product for the short version of BMPRII. For all three sets of primers the short form of BMPRII was not detected.

Primers used are as follows:

**A:** ATGGCTGAACTCATGATG

**B:** AGCTTGAAAACATCTCACAG

**C:** GTGGTCATGCCAGTACTTGG

**D:** CCATCAAAGCCCAGAAGAGC

**E:** AGGATGCAGAGGCTCGGC

**F:** GTGGAGATGACCCAGGTGG

**G:** TCACAGACAGTTCAT

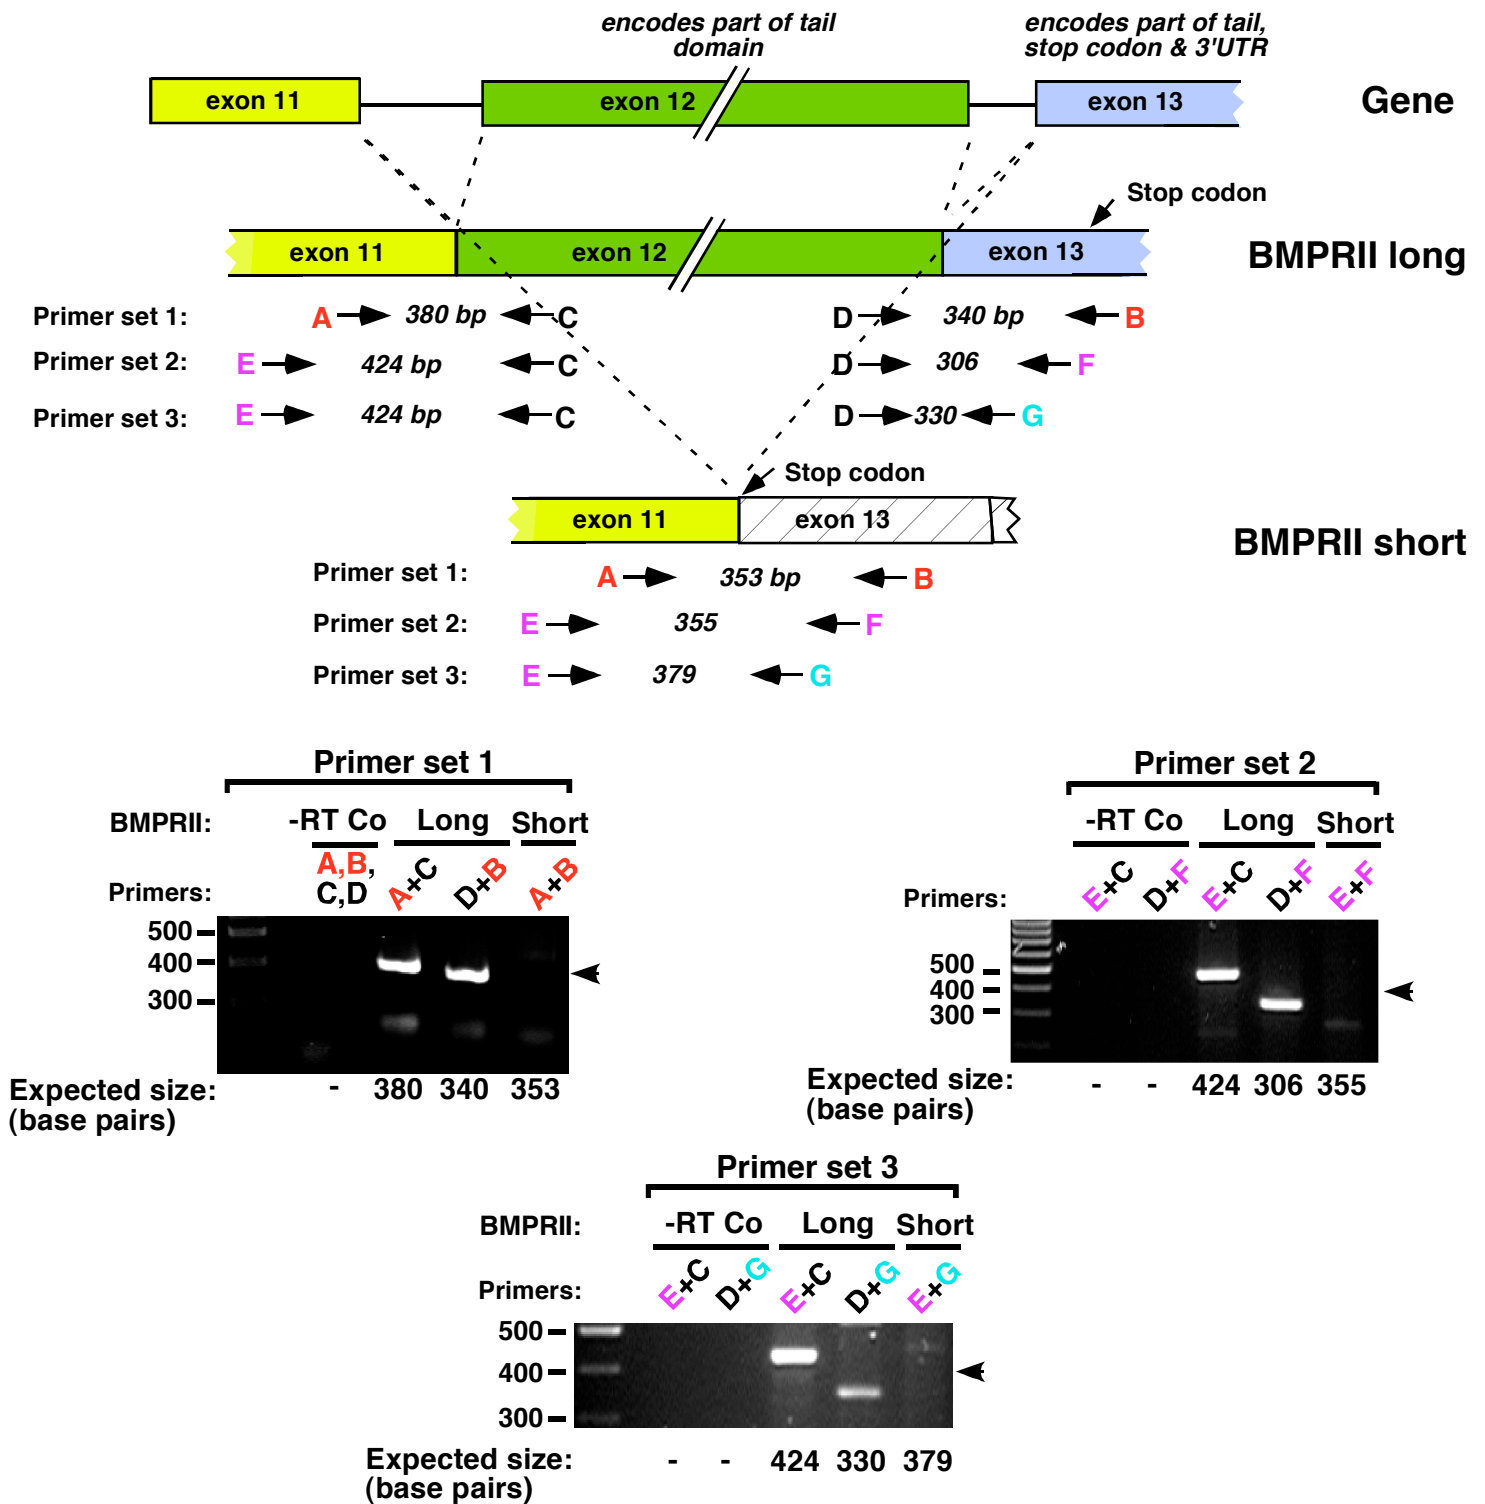

Supplementary Figure 1.  
Lee-Hoeflich/Causing et al.
